# Supplementary material
Source: HighWire-hosted journal article supplement (https://www.cmaj.ca/highwire/filestream/58614/field_highwire_adjunct_files/0/image-lai-f.pdf)
Supplement: image-lai-f.pdf [file image-lai-f.pdf]

## IMAGES CLINIQUES

## Myélinolyse centropontine

Chih-Cheng Lai MD, Che-Kim Tan MD, Sheng-Hsiang Lin MD, Huan-Wen Chen MD

Une femme de 77 ans a été admise pour des saignements des gencives et un œdème progressif des jambes. Elle avait des antécédents de diabète sucré de type 2, d'hypertension et d'accident ischémique cérébral isolé. Elle prenait de la warfarine pour une fibrillation auriculaire chronique. Elle était sous-alimentée, mais n'avait pas d'antécédents d'abus d'alcool. Elle avait besoin d'une assistance complète dans ses activités quotidiennes en raison d'une démence. À l'examen, elle était désorientée mais alerte. On a noté des râles basilaires, une distension des veines jugulaires augmentée à 8 cm H<sub>2</sub>O et un œdème des jambes. Les examens de laboratoire ont montré un niveau de sodium sérique de 100,8 mmol/L (normal de 133 à 145 mmol/L), un temps de Quick prolongé et un rapport international normalisé (RIN) de 3,32. Étant donné que la patiente présentait un RIN supérieur à la fourchette thérapeutique, on lui a administré de la vitamine K et le saignement des gencives s'est résolu rapidement.

La patiente a reçu une perfusion de solution saline hypertonique (chlorure de sodium à 3%) et sa consommation de liquides a été limitée pour traiter l'hyponatrémie que l'on présumait être liée à une insuffisance cardiaque. Son sodium sérique augmentait à un taux inférieur à 0,5 mmol/L par heure, sauf pour la période allant de la 30<sup>e</sup> heure à la 36<sup>e</sup> heure, période pendant laquelle on a noté une augmentation de la concentration sérique de 11,5 mmol/L (équivalant à 1,9 mmol/L par heure). L'augmentation du sodium sérique a alors été maintenue à un taux de 0,5 à 1,0 mmol/L par heure par la suite. À la 60<sup>e</sup> heure de perfusion, la patiente est devenue comateuse et présentait un taux sérique de 127,5 mmol/L. L'imagerie par résonance magnétique du cerveau a montré une myélinolyse centropontine d'aspect classique, accompagnée d'une lésion hyperintense de la protubérance annulaire avec épargne des voies ventrolatérales et corticospinales sur les images pondérées en T2 (figure 1A) et un signal d'hyperintensité dans la zone correspondante sur l'IRM de diffusion (figure 1B). Le diagnostic de myélinolyse centropontine a été établi à la lumière des manifestations cliniques typiques et de l'apparence lors des études d'imagerie, ainsi que de l'exclusion des autres causes plausibles, telles que des médicaments, un AVC ou d'autres déséquilibres biochimiques.

La myélinolyse centropontine a été décrite pour la première fois par Adams et ses collègues

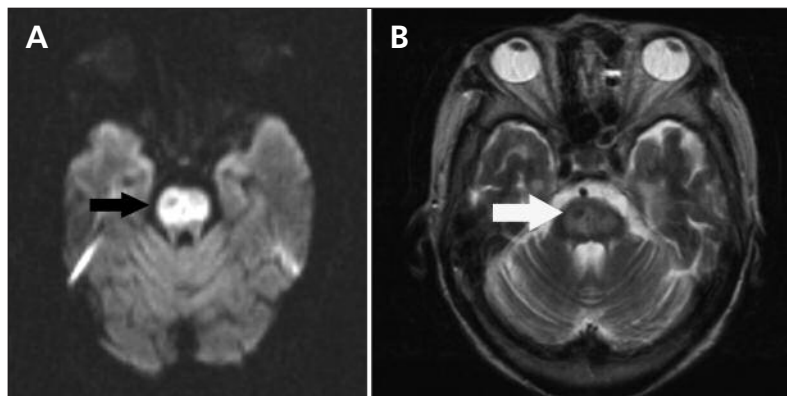

Figure 1 : Images par résonance magnétique du cerveau d'une femme de 77 ans atteinte de myélinolyse centropontine montrant une lésion hyperintense de la protubérance annulaire (flèche) avec épargne des voies ventrolatérales et corticospinales sur une image pondérée en T2 (A) et un signal d'hyperintensité dans la zone correspondante (flèche) sur l'IRM de diffusion (B).

en 1959 dans le cadre d'une étude clinico-pathologique menée auprès de patients alcooliques ou dénutris<sup>1</sup>. L'alcoolisme chronique, un déséquilibre électrolytique et une greffe de foie sont associés à un risque accru de myélinolyse centropontine, et celle-ci peut se produire après la correction rapide d'une hyponatrémie<sup>2</sup>. Une diminution des niveaux de conscience est la manifestation la plus fréquente de la myélinolyse centropontine<sup>2</sup>. D'autres symptômes incluent une paralysie horizontale du regard, une paralysie pseudobulbaire et une quadriplégie. L'imagerie par résonance magnétique, en particulier l'IRM de diffusion, peut être très utile à l'établissement d'un diagnostic précoce. Le pronostic est généralement sombre<sup>1,2</sup>, comme ce fut le cas pour cette patiente, qui ne s'est pas rétablie de son coma.

Dans les cas d'hyponatrémie graves, le taux de correction avec une perfusion saline doit être ajusté avec précaution en fonction de la rapidité du développement de l'hyponatrémie et de la gravité des symptômes<sup>3</sup> pour éviter le développement d'une myélinolyse centropontine, en particulier chez les personnes présentant des facteurs de risque.

## Références

1. Adams RD, Victor M, Mancall EL. « Central pontine myelinolysis: a hitherto undescribed disease occurring in alcoholic and malnourished patients ». *AMA Arch Neurol Psychiatry* 1959; 81:154-72.
2. Brown WD. « Osmotic demyelination disorders: central pontine and extrapontine myelinolysis ». *Curr Opin Neurol* 2000; 13:691-7.
3. Yeates KE, Singer M, Morton AR. « Salt and water: a simple approach to hyponatremia ». *CMAJ* 2004 ;170:365-9.

**Intérêts concurrents :**  
Aucun déclaré.

Cet article a été revu par les pairs.

**Affiliations :** Du Département de médecine de soins intensifs (Lai), Chi-Mei Medical Center, Liouying, Tainan; du Département de médecine de soins intensifs (Tan), Chi-Mei Medical Center, Yungkuang, Tainan; du Département de médecine interne (Lin), New Taipei County Hospital, New Taipei County; et du Département de médecine interne (Chen), Lotung Pohai Hospital, Yi-Lan, Taïwan

**Correspondance à :**  
Dr Chih-Cheng Lai,  
dtmed141@yahoo.com.tw

JAMC 2011. DOI:10.1503/cmaj.090186
